# Supplementary material for: The Effects of Dietary n-3 Highly Unsaturated Fatty Acids on Growth, Antioxidant Capacity, Immunity, and Oxylipin Profiles in Acipenser dabryanus
Source: MDPI journal article supplement (doi:10.3390/antiox13040421), 2024-03-29
Supplement: s1 [file s1]

**Table S1. Liner equation and the profile of oxylipins in Yangtze sturgeon fed n-3 highly unsaturated fatty acids diets**  
(nM/L; n=3, mean vaule)

| Index               | Class | Equation                   | r       | Dietary inclusion of n-3 highly unsaturated fatty acid |          |          |         |         | LLOQ | ULOQ  |
|---------------------|-------|----------------------------|---------|--------------------------------------------------------|----------|----------|---------|---------|------|-------|
|                     |       |                            |         | level (% of diet)                                      |          |          |         |         |      |       |
|                     |       |                            |         | 0.50%                                                  | 1.00%    | 1.50%    | 2.00%   | 2.40%   |      |       |
| 11-HEDE             | -     | y = 0.01178 x - 3.11630e-4 | 0.99800 | 12.6                                                   | 4.97     | 4.66     | 7.98    | 6.39    | 0.2  | 400   |
| 15-HEDE             | -     | y = 0.01381 x - 0.00128    | 0.99393 | 103.20                                                 | 14.52    | 8.91     | 38.25   | 50.80   | 0.2  | 400   |
| 13-HOTrE            | ALA   | y = 0.00719 x - 2.57666e-4 | 0.99549 | 254.98                                                 | 20.94    | 18.39    | 174.77  | 273.24  | 0.2  | 400   |
| 9(S)-HpOTrE         | ALA   | y = 0.00999 x - 0.00168    | 0.99558 | 47.21                                                  | 25.23    | 26.46    | 43.80   | 18.51   | 0.2  | 400   |
| 9-OxoOTrE           | ALA   | y = 0.01012 x + 0.00341    | 0.99357 | 2.13                                                   | 1.24     | 1.76     | 1.83    | 1.09    | 0.2  | 400   |
| α-LA                | ALA   | y = 0.12160 x + 0.01238    | 0.99821 | 9505.94                                                | 10059.31 | 10259.05 | 9321.25 | 5866.88 | 40   | 40000 |
| 20-hydroxyPGF2α     | ARA   | y = 0.00998 x + 6.42569e-4 | 0.99960 | 1.92                                                   | 4.62     | 1.83     | 1.74    | 4.64    | 1    | 400   |
| 6keto-PGF1α         | ARA   | y = 0.01206 x + 6.38911e-4 | 0.99705 | 5.11                                                   | 5.83     | 5.35     | 4.78    | 7.02    | 0.2  | 400   |
| 5-isoPGF2VI         | ARA   | y = 0.62607 x + 0.01282    | 0.99790 | 0.77                                                   | 0.42     | 0.36     | 0.09    | 0.61    | 0.2  | 400   |
| 11β-PGF2α           | ARA   | y = 0.51412 x + 0.01338    | 0.99916 | 0.75                                                   | 0.39     | 0.34     | 0.08    | 0.59    | 1    | 400   |
| 8-iso-PGF2α         | ARA   | y = 0.46647 x + 0.00998    | 0.99791 | 85.72                                                  | 44.48    | 37.58    | 12.70   | 67.26   | 10   | 400   |
| PGE2                | ARA   | y = 0.02384 x + 0.00123    | 0.99144 | 9.15                                                   | 5.37     | 4.54     | 3.21    | 6.19    | 0.2  | 400   |
| 11β-PGE2            | ARA   | y = 0.02953 x + 9.09588e-4 | 0.99867 | 7.15                                                   | 4.49     | 3.82     | 2.67    | 3.83    | 0.4  | 400   |
| 15-keto-PGF2α       | ARA   | y = 0.04604 x + 0.00166    | 0.99920 | 1.87                                                   | 1.31     | 1.03     | 0.73    | 1.18    | 4    | 400   |
| PGA2                | ARA   | y = 0.00636 x + 0.00117    | 0.99745 | 28.51                                                  | 16.10    | 13.01    | 6.50    | 7.66    | 0.4  | 400   |
| tetranor-12(S)-HETE | ARA   | y = 0.01895 x + 3.40177e-4 | 0.99940 | 0.14                                                   | 0.20     | 0.12     | 0.18    | 0.11    | 0.2  | 400   |
| 14(15)-DiHET        | ARA   | y = 0.09944 x + 0.00688    | 0.99959 | 19.31                                                  | 18.18    | 13.55    | 26.24   | 8.32    | 0.2  | 400   |
| 12-HHT              | ARA   | y = 0.00272 x - 1.70150e-4 | 0.99553 | 0.77                                                   | 2.40     | 0.59     | 0.65    | 0.79    | 0.4  | 400   |

|                 |      |                                 |         |          |          |          |          |          |     |       |
|-----------------|------|---------------------------------|---------|----------|----------|----------|----------|----------|-----|-------|
| 11(12)-DiHET    | ARA  | $y = 0.04910 x + 0.00350$       | 0.99834 | 12.98    | 12.49    | 9.03     | 17.93    | 5.80     | 0.2 | 400   |
| 20-COOH-AA      | ARA  | $y = 0.06452 x - 0.00104$       | 0.99273 | 9.96     | 9.86     | 10.78    | 11.20    | 7.01     | 0.4 | 400   |
| 8(9)-DiHETE     | ARA  | $y = 0.01823 x - 5.32128e-5$    | 0.99968 | 1.32     | 1.41     | 2.35     | 6.97     | 3.09     | 0.2 | 400   |
| 5,6-DiHETrE     | ARA  | $y = 0.11782 x + 0.00554$       | 0.99375 | 3.48     | 3.30     | 2.51     | 4.21     | 1.56     | 0.2 | 400   |
| 20-HETE         | ARA  | $y = 0.01080 x + 2.27241e-4$    | 0.99938 | 0.89     | 0.82     | 0.97     | 1.13     | 0.70     | 0.2 | 400   |
| 18-HETE         | ARA  | $y = 0.01829 x + 3.09395e-4$    | 0.99917 | 1.03     | 1.11     | 1.21     | 2.46     | 1.35     | 0.2 | 400   |
| 17-HETE         | ARA  | $y = 0.01811 x + 2.63373e-4$    | 0.99923 | 1.06     | 1.10     | 2.53     | 5.31     | 3.03     | 0.2 | 400   |
| 16-HETE         | ARA  | $y = 0.00773 x + 1.62531e-4$    | 0.99932 | 3.24     | 3.03     | 2.81     | 3.49     | 2.00     | 0.2 | 400   |
| 15-HETE         | ARA  | $y = 0.16819 x + 0.00636$       | 0.99599 | 309.73   | 97.96    | 41.24    | 189.80   | 159.01   | 2   | 4000  |
| 11(S)-HETE      | ARA  | $y = 0.42145 x + 0.01434$       | 0.99637 | 21.32    | 21.37    | 12.15    | 17.14    | 12.37    | 2   | 4000  |
| 8-HETE          | ARA  | $y = 0.16318 x + 0.00493$       | 0.99537 | 16.62    | 20.31    | 10.65    | 14.28    | 9.22     | 2   | 4000  |
| 12-HETE         | ARA  | $y = 0.15414 x + 0.00362$       | 0.99690 | 37.54    | 34.61    | 17.79    | 23.59    | 15.52    | 2   | 4000  |
| 5-HETE          | ARA  | $y = 0.02700 x + 1.09194e-4$    | 0.99854 | 29.71    | 38.63    | 33.66    | 31.68    | 18.30    | 4   | 4000  |
| 14,15-EET       | ARA  | $y = 0.00931 x + 0.00356$       | 0.99814 | 2500.65  | 1769.35  | 1252.24  | 3139.09  | 1029.91  | 0.2 | 400   |
| 5-oxoETE        | ARA  | $y = 0.13437 x + 0.00779$       | 0.99916 | 19.57    | 21.60    | 14.39    | 21.26    | 7.99     | 0.2 | 400   |
| 11,12-EET       | ARA  | $y = 0.00350 x + 0.00150$       | 0.99893 | 1575.64  | 1216.18  | 961.99   | 1965.22  | 687.03   | 0.2 | 400   |
| 8,9-EET         | ARA  | $y = 0.00519 x + 0.00107$       | 0.99933 | 579.1    | 437.10   | 328.99   | 702.19   | 235.10   | 0.2 | 400   |
| 5,6-EET         | ARA  | $y = 2.57205e-4 x + 5.26942e-5$ | 0.99944 | 14806.26 | 11231.76 | 8792.54  | 19224.09 | 6562.05  | 1   | 400   |
| AA              | ARA  | $y = 0.03653 x + 0.00332$       | 0.99901 | 54617.06 | 86944.10 | 56630.00 | 66650.01 | 52481.40 | 40  | 40000 |
| 11-deoxyPGE1    | DGLA | $y = 0.00525 x + 0.00182$       | 0.99962 | 159.47   | 219.35   | 118.44   | 236.63   | 101.37   | 0.2 | 400   |
| 15(S)-HETrE     | DGLA | $y = 0.04118 x + 0.00231$       | 0.99874 | 103      | 20.36    | 10.29    | 40.28    | 37.55    | 0.2 | 400   |
| 8(S)-HETrE      | DGLA | $y = 0.02343 x - 7.07952e-4$    | 0.99930 | 3.39     | 4.25     | 2.98     | 2.61     | 2.40     | 0.2 | 400   |
| D- $\gamma$ -LA | DGLA | $y = 0.02922 x + 0.00131$       | 0.99150 | 21994.5  | 30731.86 | 23193    | 22493.06 | 12942.23 | 40  | 40000 |

|                  |     |                              |         |         |           |          |           |           |     |       |
|------------------|-----|------------------------------|---------|---------|-----------|----------|-----------|-----------|-----|-------|
| 19(20)-DiHDPE(A) | DHA | $y = 0.00807 x + 4.98010e-4$ | 0.99904 | 38.33   | 33.68     | 34.35    | 72.19     | 31.99     | 4   | 400   |
| 13(14)-DiHDPE(A) | DHA | $y = 0.06455 x + 0.00182$    | 0.99952 | 9.45    | 7.65      | 7.59     | 17.72     | 7.42      | 0.2 | 400   |
| 7(8)-DiHDPE(A)   | DHA | $y = 0.02011 x + 5.93627e-4$ | 0.99954 | 7.88    | 6.41      | 6.41     | 14.5      | 6.38      | 0.2 | 400   |
| 20-HDHA          | DHA | $y = 0.04026 x + 2.10443e-4$ | 0.99528 | 116.15  | 197.25    | 117.29   | 124.94    | 134.53    | 2   | 4000  |
| 16-HDHA          | DHA | $y = 0.13276 x - 0.00232$    | 0.99913 | 54.86   | 111.98    | 66.91    | 68.27     | 70.57     | 1   | 4000  |
| 17-HDHA          | DHA | $y = 0.01744 x - 0.00115$    | 0.99870 | 8813.53 | 1544.97   | 809.88   | 5493.69   | 7695.47   | 4   | 4000  |
| 13-HDHA          | DHA | $y = 0.04247 x - 0.00330$    | 0.99899 | 273.23  | 105.50    | 55.07    | 211.70    | 245.93    | 1   | 4000  |
| 10-HDHA          | DHA | $y = 0.10069 x + 5.49150e-4$ | 0.99900 | 49.63   | 105.05    | 66.46    | 62.76     | 55.61     | 1   | 4000  |
| 14(S)-HDHA       | DHA | $y = 0.04401 x + 7.91509e-5$ | 0.99802 | 60.1    | 117.42    | 63.63    | 64.44     | 63.68     | 4   | 4000  |
| 7-HDHA           | DHA | $y = 0.05313 x + 1.34606e-4$ | 0.99747 | 32.28   | 97.53     | 65.00    | 60.30     | 48.43     | 4   | 4000  |
| 8-HDHA           | DHA | $y = 0.03160 x - 0.00248$    | 0.99860 | 63.47   | 283.26    | 178.34   | 139.82    | 98.79     | 1   | 4000  |
| 19(20)-EpDPE(A)  | DHA | $y = 0.11043 x + 0.01962$    | 0.99214 | 1520.91 | 1106.22   | 934.55   | 2634.10   | 1209.07   | 0.2 | 400   |
| 4-HDHA           | DHA | $y = 0.05120 x + 5.55228e-5$ | 0.99561 | 125.93  | 338.92    | 230.30   | 187.72    | 127.55    | 4   | 4000  |
| 16(17)-EpDPE     | DHA | $y = 0.04561 x + 0.01065$    | 0.99895 | 3567.45 | 2259.00   | 2063.21  | 6022.34   | 2792.33   | 0.2 | 400   |
| 7,8-EpDPE        | DHA | $y = 0.07175 x + 0.02128$    | 0.99555 | 4095.09 | 2774.55   | 2518.40  | 6960.96   | 3181.13   | 0.2 | 400   |
| DHA              | DHA | $y = 0.18075 x + 0.02004$    | 0.99722 | 77575.4 | 141307.50 | 99673.56 | 116429.97 | 131289.60 | 40  | 40000 |
| RvE1             | EPA | $y = 0.01982 x + 0.00306$    | 0.99367 | 6.46    | 45.82     | 4.70     | 8.90      | 95.38     | 0.2 | 400   |
| PGF3 $\alpha$    | EPA | $y = 0.00890 x + 0.00139$    | 0.99662 | 121.19  | 234.95    | 113.90   | 138.44    | 109.85    | 10  | 400   |
| 17(18)-DiHETE    | EPA | $y = 0.04310 x + 0.00103$    | 0.99676 | 5.01    | 5.37      | 9.38     | 24.74     | 11.76     | 0.2 | 400   |
| 14(15)-DiHETE    | EPA | $y = 0.10046 x + 0.00180$    | 0.99713 | 1.41    | 1.54      | 2.41     | 7.13      | 3.12      | 0.2 | 400   |
| 5,6-DIHETE       | EPA | $y = 0.02281 x + 5.85342e-4$ | 0.99824 | 40.05   | 47.28     | 74.86    | 167.84    | 93.71     | 1   | 400   |
| 15-HEPE          | EPA | $y = 0.01335 x + 3.55801e-4$ | 0.99412 | 355.53  | 64.81     | 51.43    | 970.72    | 1175.33   | 0.2 | 400   |
| 11-HEPE          | EPA | $y = 0.00625 x + 2.38816e-4$ | 0.99539 | 415.54  | 72.30     | 60.14    | 1090.34   | 1344.58   | 1   | 400   |

|                          |     |                              |         |          |          |          |          |          |     |       |
|--------------------------|-----|------------------------------|---------|----------|----------|----------|----------|----------|-----|-------|
| 12-HEPE                  | EPA | $y = 0.01283 x + 2.23645e-4$ | 0.99958 | 11.29    | 11.23    | 11.44    | 17.34    | 15.41    | 0.2 | 400   |
| 5-HEPE                   | EPA | $y = 0.01093 x + 2.45261e-4$ | 0.99683 | 27.57    | 39.93    | 47.55    | 53.70    | 45.90    | 0.2 | 400   |
| 17(18)-EpETE             | EPA | $y = 0.00755 x - 7.12118e-4$ | 0.99925 | 42.3     | 60.54    | 81.09    | 125.26   | 72.39    | 0.2 | 400   |
| 14(15)-EpETE             | EPA | $y = 0.07717 x + 0.00362$    | 0.99854 | 785.27   | 721.89   | 953.26   | 3477.85  | 1621.54  | 0.2 | 400   |
| EPA                      | EPA | $y = 0.35775 x + 0.01154$    | 0.99782 | 18257.73 | 32906.33 | 32951.86 | 46873.29 | 60478.80 | 40  | 40000 |
| $\gamma$ -LA             | GLA | $y = 1.23316 x + 0.03901$    | 0.99687 | 7429.47  | 9924.74  | 6559.60  | 5871.33  | 2545.32  | 40  | 40000 |
| 9(S),10(S),13(S)-TriHOME | LA  | $y = 0.04598 x + 0.00277$    | 0.99721 | 5.16     | 2.52     | 4.88     | 3.04     | 4.94     | 0.2 | 400   |
| 12(13)-DiHOME            | LA  | $y = 0.00822 x + 7.59501e-5$ | 0.99873 | 24.5     | 16.08    | 15.60    | 31.03    | 10.03    | 0.2 | 400   |
| 9,10-DiHOME              | LA  | $y = 0.01195 x + 7.33715e-4$ | 0.99809 | 26.52    | 17.26    | 16.64    | 31.97    | 10.55    | 0.2 | 400   |
| trans-EKODE-(E)-Ib       | LA  | $y = 0.03332 x + 0.00106$    | 0.99809 | 54.41    | 32.12    | 32.22    | 51.82    | 22.99    | 0.2 | 400   |
| 13(S)-HODE               | LA  | $y = 0.05979 x + 0.00289$    | 0.99966 | 197.31   | 44.58    | 32.66    | 102.74   | 116.09   | 0.2 | 400   |
| 9-HODE                   | LA  | $y = 0.07663 x + 0.00834$    | 0.99636 | 125.1    | 35.74    | 30.11    | 76.50    | 77.83    | 0.2 | 400   |
| 12,13-EpOME              | LA  | $y = 0.16569 x + 0.02561$    | 0.99647 | 1461.9   | 949.73   | 846.91   | 1779.13  | 674.16   | 0.2 | 400   |
| 9,10-EpOME               | LA  | $y = 0.21079 x + 0.01557$    | 0.99428 | 1295.01  | 819.43   | 724.68   | 1508.83  | 582.99   | 0.2 | 400   |
| LA                       | LA  | $y = 0.10290 x + 0.00794$    | 0.99939 | 20060.5  | 28861.83 | 22015.30 | 23693.63 | 18802.76 | 40  | 40000 |
| 5-HETrE                  | MA  | $y = 0.02356 x - 4.63573e-4$ | 0.99832 | 0.37     | 0.62     | 0.46     | 0.99     | 0.31     | 0.2 | 400   |

**Table S2. Classification of 62 oxylipins in Yangtze sturgeon fed n-3 highly unsaturated fatty acids diets**

| Index                     | Sub class |
|---------------------------|-----------|
| 8-iso-PGF2 $\alpha$       | 1         |
| PGA2                      | 1         |
| 5-isoPGF2VI               | 1         |
| PGE2                      | 1         |
| 11 $\beta$ -PGF2 $\alpha$ | 1         |
| 11 $\beta$ -PGE2          | 1         |
| 15-keto-PGF2 $\alpha$     | 1         |
| 9(S),10(S),13(S)-TriHOME  | 1         |
| 9(S)-HpOTrE               | 2         |
| 8,9-EET                   | 2         |
| 5,6-EET                   | 2         |
| 5,6-DiHETrE               | 2         |
| 14,15-EET                 | 2         |
| 14(15)-DiHET              | 2         |
| 11,12-EET                 | 2         |
| 11(12)-DiHET              | 2         |
| 12(13)-DiHOME             | 2         |
| 12,13-EpOME               | 2         |
| trans-EKODE-(E)-Ib        | 2         |
| 9,10-EpOME                | 2         |
| 9,10-DiHOME               | 2         |
| 7(8)-DiHDPE(A)            | 3         |
| 7,8-EpDPE                 | 3         |
| 13(14)-DiHDPE(A)          | 3         |
| 19(20)-EpDPE(A)           | 3         |
| 16(17)-EpDPE              | 3         |
| 19(20)-DiHDPE(A)          | 3         |
| 17-HETE                   | 4         |
| 5,6-DIHETE                | 4         |
| 17(18)-EpETE              | 4         |
| 18-HETE                   | 5         |
| 17(18)-DiHETE             | 5         |
| 14(15)-EpETE              | 5         |
| 8(9)-DiHETE               | 5         |
| 14(15)-DiHETE             | 5         |

---

|                 |    |
|-----------------|----|
| 11-deoxyPGE1    | 6  |
| 5-HETrE         | 6  |
| 12-HHT          | 7  |
| 10-HDHA         | 7  |
| 4-HDHA          | 7  |
| 7-HDHA          | 7  |
| 8-HDHA          | 7  |
| 16-HDHA         | 7  |
| PGF3 $\alpha$   | 7  |
| 15-HEPE         | 8  |
| 11-HEPE         | 8  |
| EPA             | 8  |
| RvE1            | 8  |
| 15-HEDE         | 9  |
| 11-HEDE         | 9  |
| 13-HOTrE        | 9  |
| 15-HETE         | 9  |
| 15(S)-HETrE     | 9  |
| 17-HDHA         | 9  |
| 13(S)-HODE      | 9  |
| 9-HODE          | 9  |
| 8-HETE          | 10 |
| 5-oxoETE        | 10 |
| 5-HETE          | 10 |
| 12-HETE         | 10 |
| D- $\gamma$ -LA | 10 |
| $\gamma$ -LA    | 10 |

---
